# Supplementary material for: Photo-controlled RAFT polymerization mediated by organic/inorganic hybrid photoredox catalysts: enhanced catalytic efficiency
Source: Royal Society of Chemistry journal article supplement (doi:10.1039/d0py00171f), 2020-01-01
Supplement: d0py00171f1.pdf [file d0py00171f1.pdf]

## **Supporting information**

**Photo-controlled RAFT polymerization mediated by  
organic/inorganic hybrid photoredox catalysts: enhanced catalytic  
efficiency**

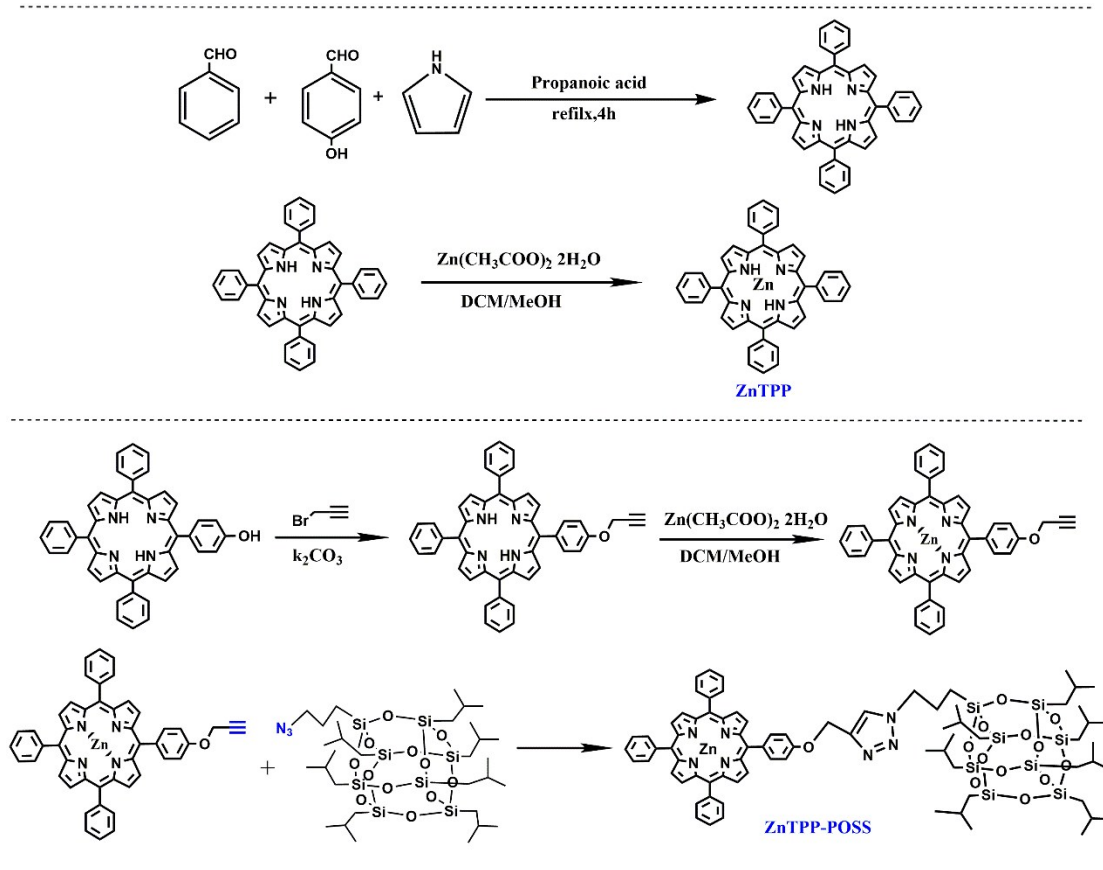

**Scheme S1.** Synthesis of zinc porphyrin (ZnTPP) and zinc porphyrin-POSS (ZnTPP-POSS).

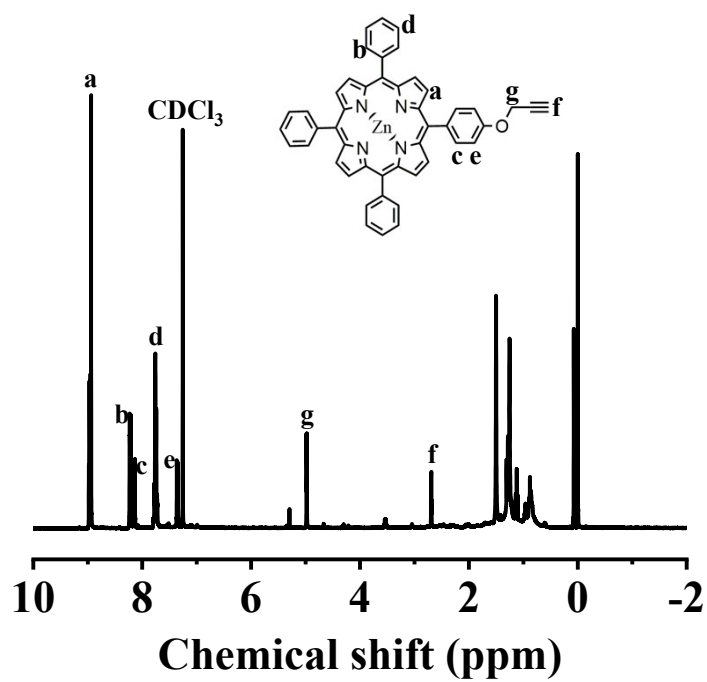

**Figure S1.**  $^1\text{H}$  NMR spectrum of alkynyl ZnTPP in  $\text{CDCl}_3$ .

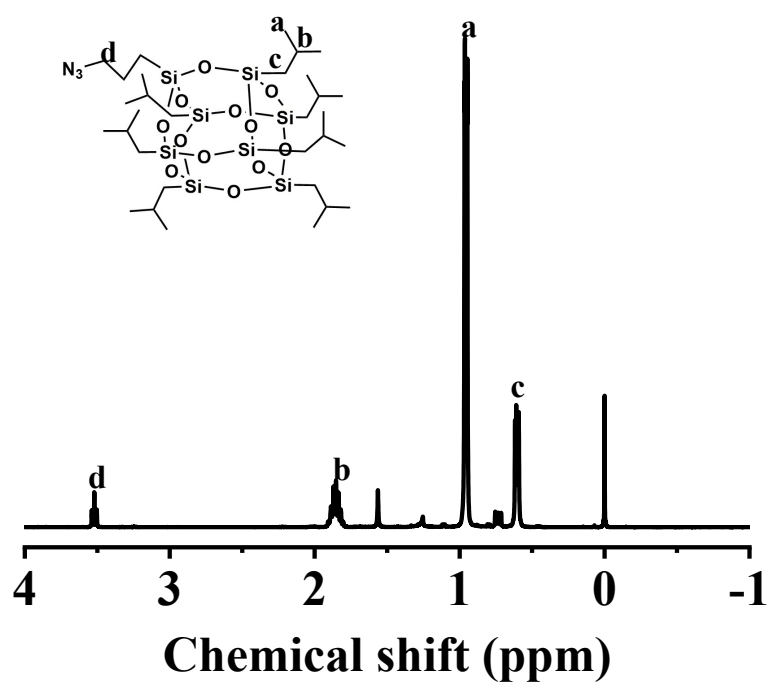

**Figure S2.**  $^1\text{H}$  NMR spectrum of POSS-N<sub>3</sub> in  $\text{CDCl}_3$ .

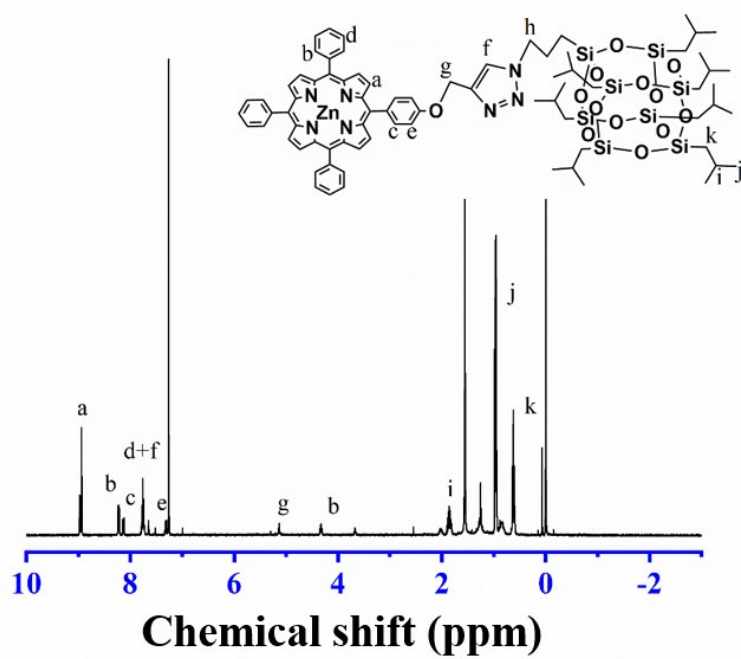

**Figure S3.**  $^1\text{H}$  NMR spectrum of ZnTPP-POSS in  $\text{CDCl}_3$ .

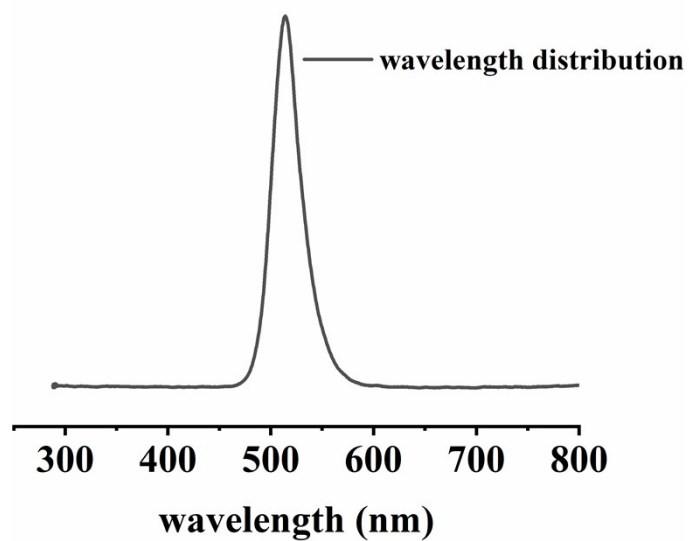

**Figure S4.** Wavelength distribution of LED light source with  $\lambda_{\text{max}} = 515$  nm.

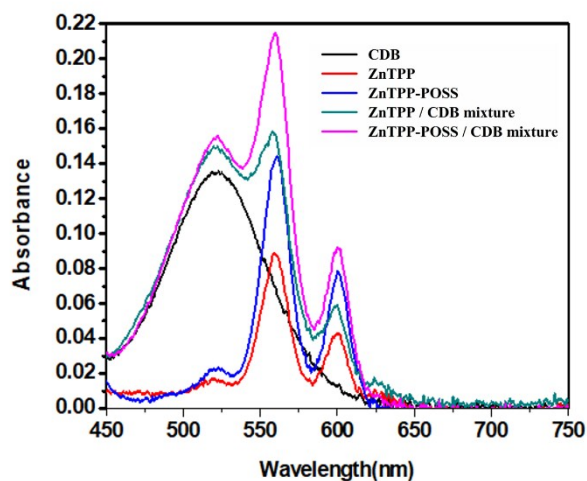

**Figure S5.** Absorption spectra of CDB, ZnTPP, ZnTPP-POSS, a mixture of ZnTPP / CDB and a mixture of ZnTPP-POSS / CDB. This UV curve is a partially enlarged view of **Figure 1A**.

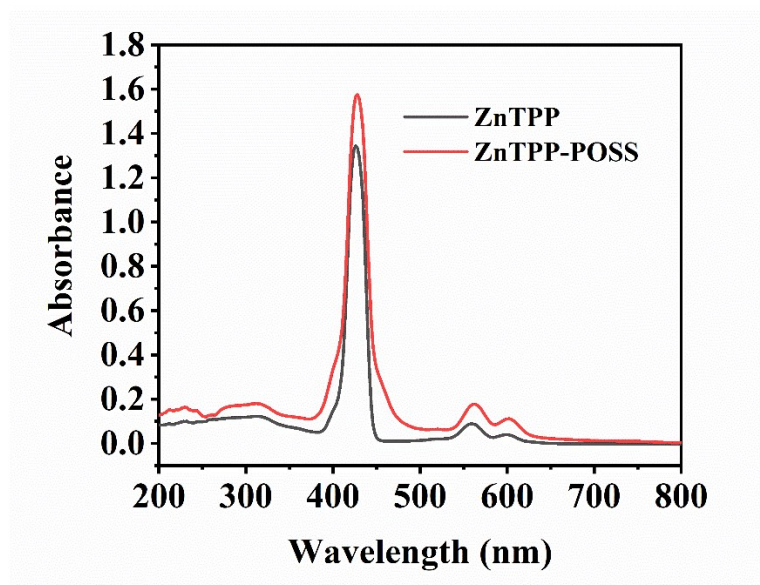

**Figure S6.** Molar extinction spectrum of ZnTPP and ZnTPP-POSS with a concentration of 19.65  $\mu\text{M}$ .

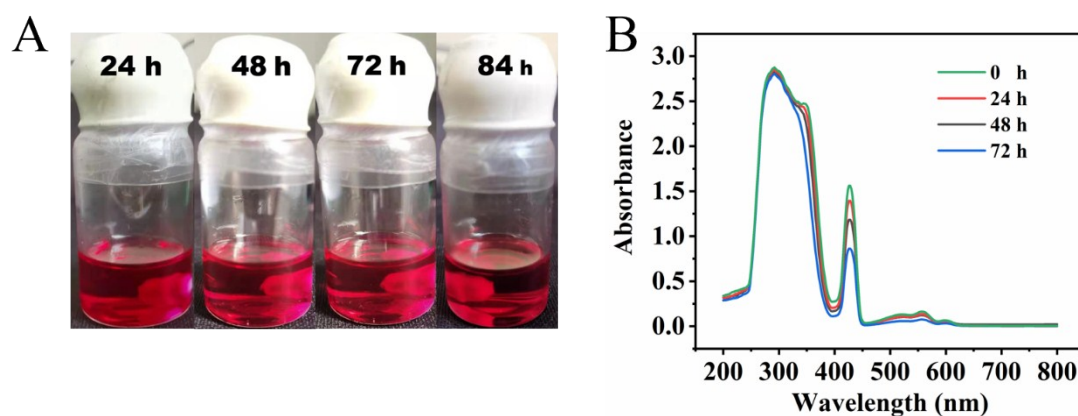

**Figure S7.** (A) Photographs of different reaction times of the polymerization system. (B) UV-Vis spectra for solution in different polymeric times.

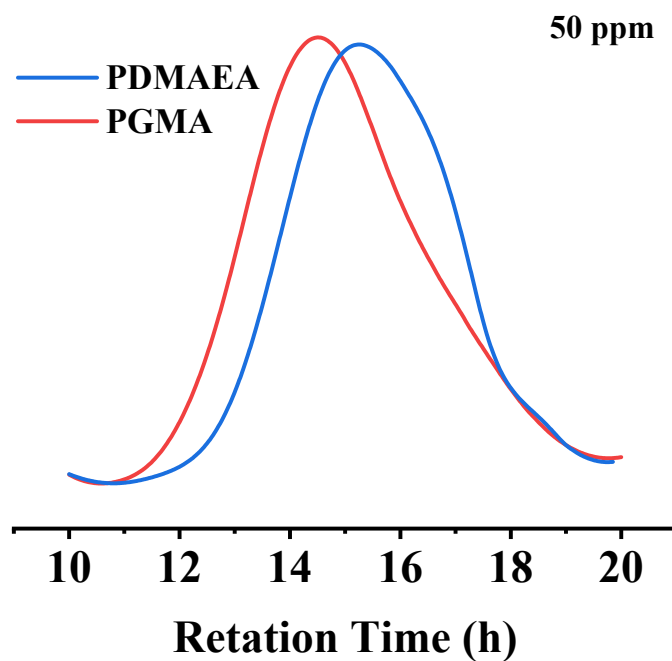

**Figure S8.** The GPC trace for PDMAEA and PGMA using ZnTPP-POSS as photocatalyst in DMSO under green light, [Monomer]/[CDB]/[ZnTPP-POSS] = 200: 1: 0.01 for 50h.

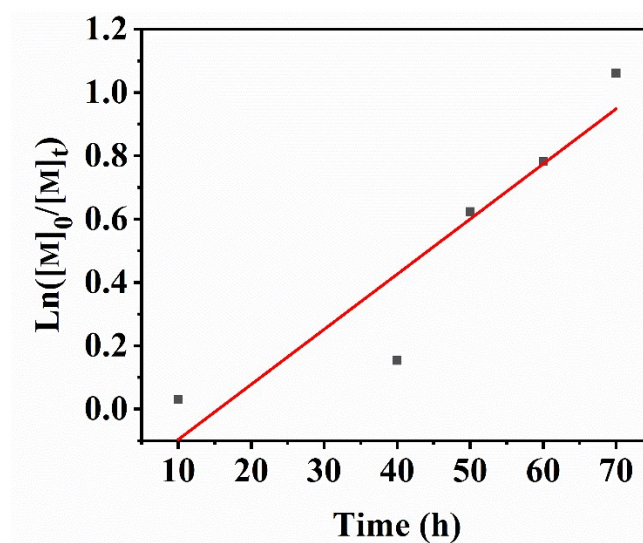

**Figure S9.** Polymerization kinetics. Results of polymerization of MMA in DMSO utilizing ZnTPP-POSS as the photo-redox catalyst, [MMA]/[CDB]/[ZnTPP-POSS] = 200: 1: 0.01.

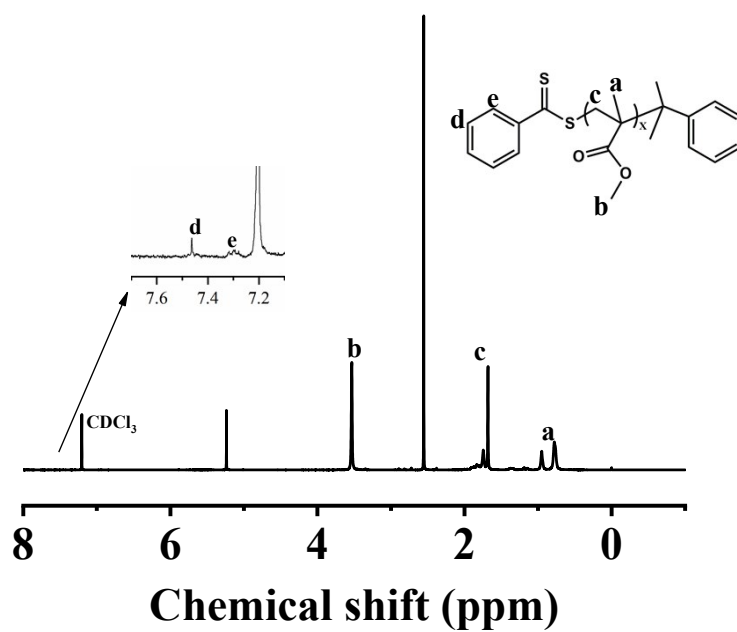

**Figure S10.**  $^1\text{H}$  NMR spectrum of PMMA in  $\text{CDCl}_3$ .

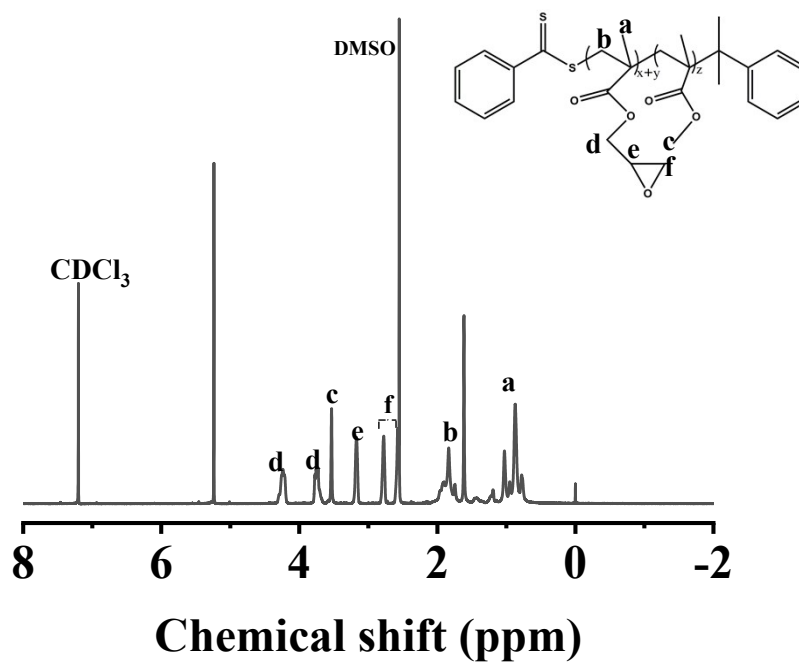

**Figure S11.**  $^1\text{H}$  NMR spectrum of PMMA-*b*-PMMA-*b*-PGMA in  $\text{CDCl}_3$ .
